# Supplementary material for: Titanacyclopentene complexes and their application as 1,4-dicarbanion equivalentsElectronic supplementary information (ESI) available: experimental details. See http://www.rsc.org/suppdata/cc/b3/b311572k/
Source: Royal Society of Chemistry journal article supplement (doi:10.1039/b311572k), 2004-01-01
Supplement: b311572k.doc [file b311572k.doc]

**Titanacyclopentene complexes and their application as 1,4-dicarbanion equivalents**

Andreas Goeke*, Daniel Mertl and Stephanie Jork

# Experimental

Melting points were determined on a Büchi 510 apparatus and are uncorrected. Nuclear magnetic resonance spectra were recorded on a Bruker Avance DPX-400 in CDCl3 or C6D6. Chemical shifts are given in parts per million (δ) downfield from tetramethylsilane (TMS) as internal standard. The following abbreviations are used: s = singlet, d = doublet, t = triplet, q = quartet, m = multiplet, dd = double doublet, bs = broad singlet. GCMS spectral data were obtained from a HP MSD 5973 using a column Varian VF5MS, 30 m, 0.25mm, 0.25m. Infrared spectra were recorded on a Bruker Vector 22 with Harrick SplitPea micro ATR (Si). High resolution mass spectra (HRMS) were recorded on a Finnigan MAT 95. Microanalyses were obtained from the Eidgenössische Materialprüfungs- und Forschungsanstalt (EMPA), Ueberlandstr. 129, CH-8600 Dübendorf, Switzerland.

All reactions were performed under N2 using solvents and reagents from Fluka or Aldrich without further purification. Solutions of 3-butenylmagnesium chloride were prepared according to standard procedures and were not titrated. Column chromatography: Merck Kieselgel 60 (particle size 0.040-0.063 m).

**2,9-Dimethyl-dec-5(*Z*)-ene-3,8-diol** (**4a**); **Typical procedure**

A solution of 3-butenylmagnesium chloride in Et2O (2 M, 2.5 eq. 30 ml, 60 mmol) was added dropwise to a solution of Ti(O*i*Pr)4 (6.82 g, 24 mmol) in Et2O (50 ml) at –70°C. The mixture turned first green then black and was allowed to warm up to –50°C. At this temperature, a solution of isobutyraldehyde (3.46 g, 48 mmol) in Et2O (10 ml) was added dropwise and the mixture was allowed to warm to –30°C during 1h. It was then poured on ice-cold 1N HCl and extracted 3 times with Et2O (3 x 50 ml). The combined organic phases were washed with sat. NaHCO3 and brine, dried (MgSO4) and evaporated *in vacuo* to yield 4.4 g of an oily residue which was further purified by flash chromatography (eluant hexane:ethyl acetate 70:30) to yield 4.10 g (85%, based on Ti(O*i*Pr)4) of **4a** as a mixture of 2 diastereomers in a ratio of 2.5:1. 1H-NMR (400 MHz, CDCl3): 0.89–0.96 (m, 12H), 1.65–1.75 (m, 2H), 2.08–2.33 (m, 4H), 2.47, 2.93 (2s, 2H, O-H), 3.35–3.38 (m, 2H), 5.54–5.63 (m, 2H) ppm. 13C-NMR (100 MHz, CDCl3): 17.8 (18.0) (q), 18.6 (18.8) (q), 31.7 (31.8) (t), 33.7 (33.1) (d), 76.0 (76.2) (d), 129.3 (128.8) (d) ppm. GC/MS (EI): 182 (M+–H2O, 1), 145 (4), 121 (8), 110 (38), 85 (83), 73 (100), 55 (82), 43 (65), 29 (16). IR (ATR): 3332br, 2958s, 2874m, 1468m, 1384m, 1002s, 871s cm-1. HRMS found: 182.1699; C12H22O (M –H2O) requires: 182.1671.

**(6*Z*)-2,11-Dimethyl-dodeca-2,6,10-triene-4,9-diol** (**4c**)

Two diastereomers in a ratio of 1:1. 1H-NMR (400 MHz, CDCl3): 1.68 (s, 6H), 1.72 (s, 6H), 2.12–2.45 (m, 6H), 4.34–4.43 (m, 2H), 5.20–5.26 (m, 2H), 5.55–5.62 (m, 2H) ppm. 13C-NMR (100 MHz, CDCl3): 18.2 (2q), 25.7 (2q), 35.5, 35.6 (2t), 68.1 (2d), 127.5 (d), 127.7 (d), 128.0 (d), 128.3 (d), 134.8 (s), 134.9 (s) ppm. IR (ATR): 3328br, 2970m, 2914m, 1443m, 1376m, 1032s, 1002s cm-1.

H)HH

**1-[4-(1-Hydroxy-cyclopentyl)-but-2(*Z*)-enyl]-cyclopentanol** (**4d**)

m. p. = 76-78°C. 1H-NMR (400 MHz, CDCl3): 1.60–1.67 (m, 12H), 1.78–1.80 (m, 4H), 2.15 (s, 2H, O-H), 2.40 (m, 4H, CH=CHC*H*2), 5.72 (m, 2H, C=C*H*) ppm. 13C-NMR (100 MHz, CDCl3): 23.6 (t), 38.6 (t), 39.4 (t), 81.8 (s), 128.4 (d) ppm. GC/MS (EI): 206 (M+ –H2O, 1), 188 (5), 137 (6), 122 (82), 107 (22), 93 (63), 85 (100), 79 (27), 67 (72), 54 (46), 41 (40), 29 (16). IR (ATR): 3305br, 2961s, 2870m, 1004s cm-1. C14H24O2 (224.33) calcd. C 74.95, H 10.78; found C 74.92, H 10.84.

**1-[4-(1-Hydroxy-cyclohexyl)-but-2(*Z*)-enyl]-cyclohexanol** (**4e**)

m. p. = 87-89°C. 1H-NMR (400 MHz, CDCl3): 1.21–1.31 (m, 2H), 1.38-1.65 (m, 18H), 2.23–2.24 (m, 2H), 2.47 (s, 2H, O-H), 5.69–5.71 (m, 2H) ppm. 13C-NMR (100 MHz, CDCl3): 22.2 (t), 25.82 (t), 37.4 (t), 39.8 (t), 71.47 (s), 127.5 (d) ppm. GC/MS (EI): 234 (M+–H2O, 1), 216 (5), 136 (76), 121 (17), 99 (100), 81 (93), 67 (28), 55 (77), 41 (41). IR (ATR): 3289br, 2927s, 2853m, 974s cm-1. C16H28O2 (252.38) calcd. C 76.14, H 11.18; found C 76.48, H 11.26.

**2,7-Dimethyl-oct-4(*Z*)-ene-2,7-diol** (**4f**)

1H-NMR (400 MHz, CDCl3): 1.24 (s, 12H), 2.26 (d, *J* = 6.4 Hz, 4H), 2.59 (bs, 2H, O-H), 5.68–5.73 (m, 2H) ppm. 13C-NMR (100 MHz, CDCl3): 29.1 (q), 40.7 (t), 70.7 (s), 127.9 (d) ppm. GC/MS (EI): 154 (M+–H2O, 1), 139 (4), 121 (7), 96 (38), 81 (69), 59 (100), 43 (53), 31 (13) . IR (ATR): 3365br, 2970s, 2932m cm-1.

**3,8-Dimethyl-deca-1,5(*Z*),9-triene-3,8-diol** (**4g**)

Mixture of 2 diastereomers in a ratio of 1.4:1. 1H-NMR (400 MHz, CDCl3): 1.32, 1.31 (2s, 6H), 2.20–2.46 (m, 4H), 5.04–5.07 (m, 2H), 5.19–5.25 (m, 2H), 5.56–5.67 (m, 2H), 5.89–5.98 (m, 2H) ppm. 13C-NMR (100 MHz, CDCl3): 27.5 (27.8) (q), 39.5 (39.6) (t), 72.8 (72.8) (s), 111.8 (111.9) (t), 127.7 (127.7) (d), 144.7 (144.6) (d) ppm. GC/MS (EI): 160 (M+–2H2O, 2), 145 (4), 108 (20), 93 (85), 79 (28), 71 (100), 55 (40), 43 (78), 27 (24). IR (ATR): 3408br, 2972m, 2931m, 1367m, 919s cm-1.

**2,2,3,8,9,9-Hexamethyl-dec-5(*Z*)-ene-3,8-diol** (**4i**)

(*Z*)-isomer: 1H-NMR (400 MHz, CDCl3): 0.97 (s, 18H), 1.16 (s, 6H), 1.76 (bs, 2H, O-H), 1.96–2.06 (m, 2H), 2.53–2.63 (m, 2H), 5.74–5.82 (m, 2H) ppm. 13C-NMR (100 MHz, CDCl3): 21.3 (q), 25.1 (q), 32.8 (t), 38.0 (s), 76.2 (s), 128.7 (d) ppm. GC/MS (EI): 220 (M+–2H2O, 3), 181 (4), 163 (9), 123 (30), 101 (86), 84 (55), 69 (12), 57 (100), 43 (92), 29 (23). (*E*)-isomer (major diastereomer): 1H-NMR (400 MHz, CDCl3): 0.96 (s, 18H), 1.12 (s, 6H), 1.76 (bs, 2H, O-H), 2.13–2.24 (m, 2H), 2.28–2.39 (m, 2H), 5.57–5.67 (m, 2H) ppm. 13C-NMR (100 MHz, CDCl3): 21.7 (q), 25.2 (q), 37.6 (s), 39.5 (t), 75.8 (s), 130.4 (d) ppm. GC/MS (EI): 220 (M+–2H2O, 3), 181 (2), 163 (4), 125 (47), 101 (100), 84 (54), 69 (12), 57 (92), 43 (87), 29 (18).

IR (mixture of (*E*) and (*Z*)-isomers, ATR): 3430br, 1957s, 2874m, 1372s, 1086s, 935m cm-1. HRMS found: 220.2199; C16H28 (M –2H2O) requires: 220.2191.

**1-(1,1-Dimethyl-but-2-enyl)-cyclopentanol** (**8**)

1H-NMR (400 MHz, CDCl3): 1.04 (s, 6H), 1.37–1.59 (m, 5H), 1.70 (d, *J* = 5.6 Hz, 3H), 1.71–1.85 (m, 4H), 5.49 (dq, *J* = 15.6, 5.6Hz, 1H), 5.56 (d, *J* = 15.6 Hz, 1H) ppm. 13C-NMR (100 MHz, CDCl3): 18.2 (q), 22.9 (2q), 24.2 (2t), 35.0 (2t), 42.2 (s), 86.4 (s), 123.8 (d), 137.9 (d) ppm. GC/MS (EI): 150 (M+–H2O, 4), 85 (100), 67 (48), 55 (32), 41 (40). IR (ATR): 3432br, 2962s, 2872m, 1451m, 1381m, 976s cm-1.

**1-(4-Methyl-pent-2-enyl)-cyclopentanol** (**9**)

1H-NMR (400 MHz, CDCl3): 0.99 (d, *J* = 6.8 Hz, 3H), 1.54–1.55 (m, 8H), 1.73–1.86 (m, 2H), 2.26 (d, *J* = 7.2 Hz, 2H), 5.44 (dt, *J* = 15.6, 7.2 Hz, 1H), 5.53 (dd, *J* = 15.6, 6.4 Hz, 1H) ppm. 13C-NMR (100 MHz, CDCl3) : 22.5 (2q), 23.7 (2t), 31.0 (d), 39.1 (2t), 44.4 (t), 81.3 (s), 122.2 (d), 142.2 (d) ppm. GC/MS (EI): 150 (M+–H2O, 2), 85 (100), 67 (51), 55 (31), 41, (36), 29 (9).

**(1*S**,2*S**,4*R**)-1,4-Dimethyl-2-vinyl-cyclohexane-1,4-diol** (**12**)

1H-NMR (400 MHz, C6D6): 1.03 (s, 3H, 4-CH3), 1.16 (s, 3H, 1-CH3), 1.22 (dt, *J* = 14.0, 4.4 Hz, 1H, 6-Ha), 1.11–1.57 (m, 3H, 3-Ha, 5-Ha, 6-Hb), 1.80-2.00 (m, 3H, 2-H, 3-Hb, 5-Hb), 4.97 (dd, *J* = 17.4, 1.4 Hz, 1H, CH=C*Ha*H*b*), 5.03 (dd, *J* = 10.4, 2.0 Hz, 1H, CH=CH*aHb*), 5.93 (ddd, *J* = 17.4, 10.4, 8.4 Hz, 1H, C*H*=CH2) ppm. 13C-NMR (100 MHz, C6D6) : 25.4 (q, C4-CH3), 28.6 (q, C1-CH3), 35.9 (t, C-5), 37.6 (t, C-6), 42.1 (t, C-3), 49.2 (d, C-2), 69.3 (s, C-1), 70.3 (s, C-4), 115.7 (t, CH=*C*H2), 139.3 (d, C*H*=CH2) ppm. GC/MS (EI): 152 (M+–H2O, 3), 137 (8), 109 (21), 94 (77), 79 (82), 55 (18), 43 (100). IR (ATR): 3396br, 3309br, 2937m, 1366m, 1039m, 910s, 891m cm-1.

**Hept-5(*Z*)-en-3-one** (**15a**)

1H-NMR (400 MHz, CDCl3): 1.06 (t, *J* = 7.2 Hz, 3H, 1-H), 1.62–1.65 (m, *J* = 5.6 Hz, 3H, 7-H), 2.47 (q, *J* = 7.2 Hz, 2H, 2-H), 3.17 (d, *J* = 7.2 Hz, 2H, 4-H), 5.53–5.73 (m, 2H, 5,6-H) ppm. 13C-NMR (100 MHz, CDCl3) : 7.6 (q), 12.8 (q), 35.2 (t), 40.8 (t), 121.9 (d), 127.3 (d), 209.3 (s) ppm. GC/MS (EI): 112 (M+, 11), 83 (8), 57 (100), 29 (53). IR (ATR): 2978m, 2938m, 1715s, 1459m, 1351m, 1111m cm-1.

**2-Methyl-hept-5(*Z*)-en-3-one** (**15b**)

1H-NMR (400 MHz, CDCl3): 1.11 (d, *J* = 7.2 Hz, 6H, 1-H, 2-CH3), 1.62-1.65 (m, *J* = 5.6 Hz, 3H, 7-H), 2.67 (sept, *J* = 7.2 Hz, 1H, 2-H), 3.21-3.24 (m, 2H, 4-H), 5.53-5.73 (m, 2H, 5,6-H) ppm. 13C-NMR (100 MHz, CDCl3) : 13.0 (q), 18.2 (2q), 38.9 (t), 40.4 (d), 122.1 (d), 127.3 (d), 212.6 (s) ppm. GC/MS (EI): 126 (M+, 4), 83 (6), 71 (44), 55 (38), 43 (100), 27 (17). IR (ATR): 2971m, 2934m, 1712s, 1467m, 1052m cm-1.

**Dec-5(*Z*)-ene-3,8-dione** (**16**)

1H-NMR (400 MHz, CDCl3): 1.06 (2t, *J* = 7.2, 6H, 1,10-H), 2.47 (2q, *J* = 7.2 Hz, 4H, 2,9-H), 3.18 (2d, *J* = 6.0 Hz, 4H, 4,7-H), 5.76-5.86 (m, 2H, 5,6-H) ppm. 13C-NMR (100 MHz, CDCl3): 7.8 (q), 35.6 (t), 41.2 (t), 124.7 (d), 208.8 (s) ppm. GC/MS (EI): 168 (M+, 4), 150 (4), 111 (15), 93 (10), 77 (5), 57 (100), 39 (5), 29 (32). IR (ATR): 2.978m, 2.940m, 1710s, 1460m, 1356m, 1112m, 979m cm-1.

**7-(1-Hydroxy-cyclopentyl)-hept-5(*Z*)-en-3-one** (**17a**), **Typical procedure**

A solution of 3-butenylmagnesium chloride in Et2O (2M, 2.5 eq. 30 ml, 60 mmol) was added dropwise to a solution of Ti(O*i*Pr)4 (6.82 g, 24 mmol) in Et2O (50 ml) at –70°C. The mixture turned first green then black and was allowed to warm up to –50°C. At this temperature, a solution of proprionitrile (1.32 g, 24 mmol) in Et2O (10 ml) was added dropwise and the mixture was then allowed to warm to –30C° during 1h. Cyclopentanone (2.02 g, 24 mmol) dissolved in Et2O (10 ml) was added and the mixture was warmed to –10°C during 1h. The solution was than poured on ice-cold 2N HCl, stirred for 2h and extracted 3 times with Et2O (3 x 50 ml). The combined organic phases were washed with sat. NaHCO3 and brine, dried (MgSO4) and evaporated *in vacuo*. The oily residue was further purified by flash chromatography (eluant hexane:ethyl acetate 80:20) to yield 3.57 g (76%) of a colorless oil.

1H-NMR (400 MHz, CDCl3): 1.05 (t, *J* = 7.2 Hz, 3H), 1.55–1.60 (m, 6H), 1.75–1.88 (m, 2H), 2.05 (bs, 1H, O-H), 2.34 (d, *J* = 6.8 Hz, 2H), 2.49 (q, *J* = 7.2 Hz, 2H), 3.23 (d, *J* = 5.6 Hz, 2H), 5.67–5.80 (m, 2H) ppm. 13C-NMR (100 MHz, CDCl3): 7.7 (q), 23.7 (2t), 35.80 (t), 39.0 (t), 39.3 (2t), 41.0 (t), 81.6 (s), 124.2 (d), 129.1 (d), 209.7 (s) ppm. GC/MS (EI): 196 (M+, 1), 178 (4), 167 (13), 114 (17), 81 (19), 57 (100), 41 (18), 29 (32). HRMS found 196.1465; C12H20O2 requires: 196.1463.

**8-Hydroxy-8-methyl-deca-5,9-dien-3-one** (**17b**)

1H-NMR (400 MHz, CDCl3): 1.06 (t, *J* = 7.2 Hz, 3H, 1-H), 1.29 (s, 3H, 8-CH3), 2.20 (bs, 1H, O-H), 2.24–2.36 (m, 2H, 7-H), 2.48 (q, *J* = 7.2 Hz, 2H, 2-H), 3.21 (d, *J* = 6.8 Hz, 2H, 4-H), 5.06 (d, *J* = 11.2 Hz, 1H, 10-Ha), 5.23 (d, *J* = 17.2 Hz, 1H, 10-Hb), 5.62–5.77 (m, 2H, 5,6-H), 5.93 (dd, *J* = 17.2, 11.2 Hz, 1H, 9-H) ppm. 13C-NMR (100 MHz, CDCl3) : 7.6 (q), 27.4 (q), 35.7 (t), 40.0 (t), 40.9 (t), 72.6 (s), 111.9 (t), 124.4 (d), 127.9 (d), 144.4 (d), 209.5 (s) ppm. GC/MS (EI): 182 (M+, 1), 167 (5), 112 (11), 93 (12), 71 (26), 57 (100), 43 (24), 29 (25). IR (ATR): 3459br, 2974m, 2938w, 1712s, 1241m, 1111m, 921m cm-1. HRMS found 182.1285; C11H18O2 requires: 182.1307.

**8-Hydroxy-dec-5-en-3-one** (**17c**)

1H-NMR (400 MHz, CDCl3): 0.97 (t, *J* = 7.6 Hz, 3H, 10-H), 1.05 (t, *J* = 7.2 Hz, 3H, 1-H), 1.45–1.58 (m, 2H, 9-H), 2.13–2.28 (m, 2H, 7-H), 2.49 (q, *J* = 7.2 Hz, 2H, 2-H, 2-H), 2.64 (bs, 1H, O-H), 3.22 (d, *J* = 5.6 Hz, 2H, 4-H), 3.54–3.58 (m, 1H, 8-H), 5.64–5.72 (m, 2H, 5,6-H) ppm. 13C-NMR (100 MHz, CDCl3) : 7.5 (q), 9.8 (q), 29.5 (t), 34.8 (t), 35.6 (t), 40.9 (t), 72.1 (d), 123.5 (d), 129.4 (d), 209.6 (s) ppm. GC/MS (EI): 152 (M+–H2O, 4), 141 (8), 114 (6), 95 (7), 81 (13), 57 (100), 41 (9), 29 (27). IR (ATR): 3428br, 2966m, 2936m, 2878m, 1711s, 1460m, 1352m, 1110m, 978m cm-1. HRMS found 170.1299; C10H18O2 requires: 170.1307.
